# Supplementary material for: Comorbidity-Guided Text Mining and Omics Pipeline to Identify Candidate Genes and Drugs for Alzheimer’s Disease
Source: MDPI journal article supplement (doi:10.3390/genes15050614), 2024-05-11
Supplement: s1 [file s1]

# Comorbidity-Guided Text Mining and Omics Pipeline to Identify Candidate Genes and Drugs for Alzheimer's Disease

Iyappan Ramalakshmi Oviya <sup>1,†</sup>, Divya Sankar <sup>2,†</sup>, Sharanya Manoharan <sup>3</sup>, Archana Prabahar <sup>4</sup> and Kalpana Raja <sup>5,6,\*</sup>

<sup>1</sup> Department of Computer Science and Engineering, Amrita School of Computing, Amrita Vishwa Vidyapeetham, Chennai 641112, India; ir\_oviya@ch.amrita.edu

<sup>2</sup> Department of Sciences, Amrita School of Engineering, Amrita Vishwa Vidyapeetham, Chennai 601103, India; s\_divya@ch.students.amrita.edu

<sup>3</sup> Department of Bioinformatics, Stella Maris College, Chennai 600086, India; sharanyas.m@stellamariscollege.edu.in

<sup>4</sup> Center for Gene Regulation in Health and Disease, Department of Biological, Geological, and Environmental Sciences (BGES), Cleveland State University, Cleveland, OH 44115, USA; a.prabahar@csuohio.edu

<sup>5</sup> School of Biomedical Informatics, University of Texas Health Science Center, Houston, TX 77030, USA

<sup>6</sup> Section for Biomedical Informatics and Data Science, School of Medicine, Yale University, New Haven, CT 06510, USA

\* Correspondence: kalpana.rajaa@gmail.com

† These authors contributed equally to this work.

**Supplementary Data S2.** Gene interaction network and co-expression profiling for AD and each comorbid disease under study

**Supplementary Data S2a.** Gene interaction network and co-expression profiling for AD and dementia

**Supplementary Data S2b.** Gene interaction network and co-expression profiling for AD and type 2 diabetes

**Supplementary Data S2c.** Gene interaction network and co-expression profiling for AD and hypertension

**Supplementary Data S2d.** Gene interaction network and co-expression profiling for AD and Parkinson's disease

**Supplementary Data S2e.** Gene interaction network and co-expression profiling for AD and down syndrome

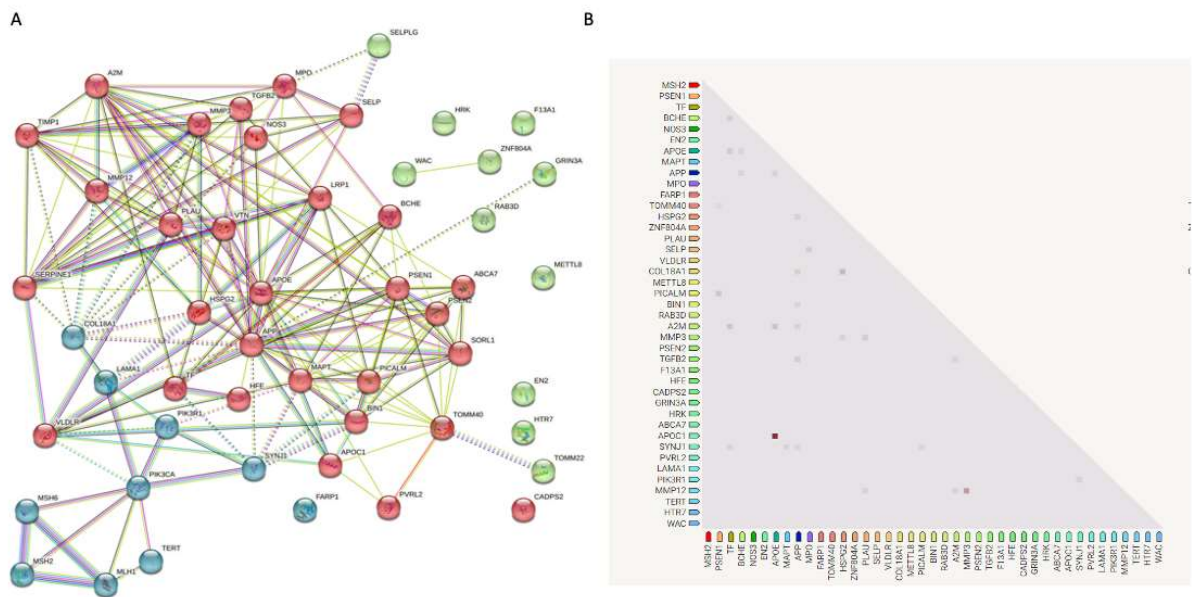

**Supplementary Data S2a.** Gene interaction network and co-expression profiling for AD and dementia

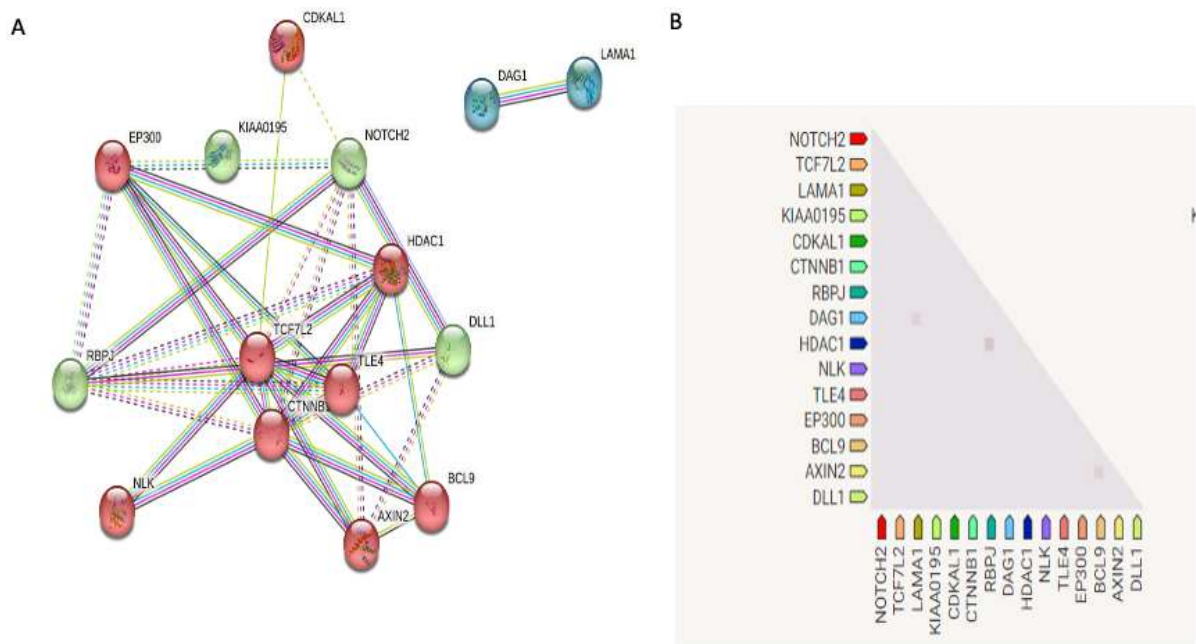

**Supplementary Data S2b.** Gene interaction network and co-expression profiling for AD and type 2 diabetes

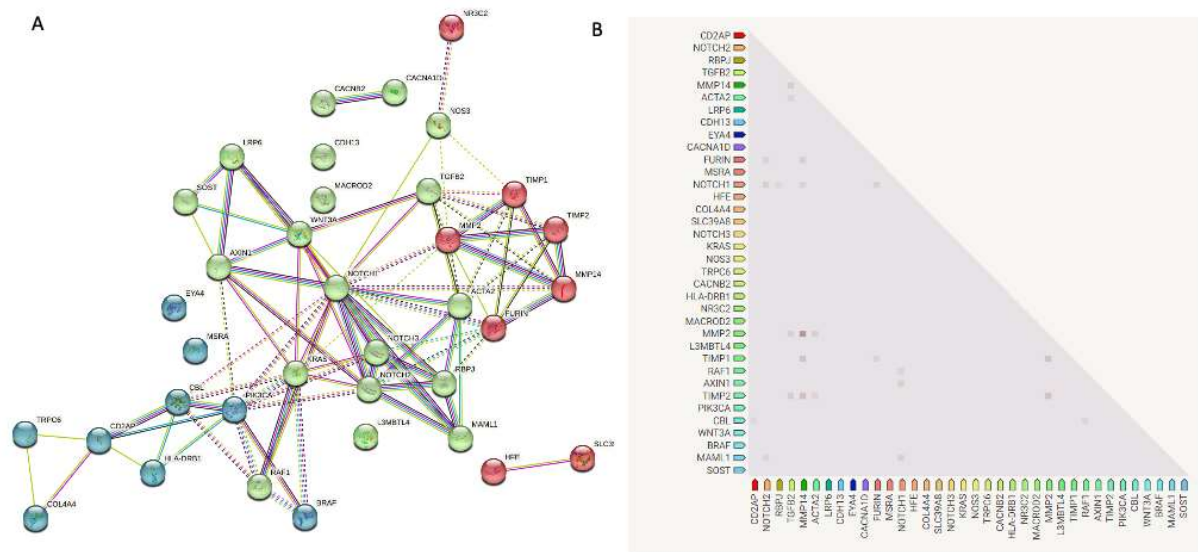

**Supplementary Data S2c. Gene interaction network and co-expression profiling for AD and hypertension**
